# Supplementary material for: Facile synthesis of anisotropic porous chitosan/hydroxyapatite scaffolds for bone tissue engineering
Source: Royal Society of Chemistry journal article supplement (doi:10.1039/c1jm11503k), 2011-01-01
Supplement: c1jm11503k.pdf [file c1jm11503k.pdf]

## Facile synthesis of anisotropic porous chitosan/hydroxyapatite scaffolds for bone tissue engineering

Xuan Cai,<sup>a</sup> Li Chen,<sup>a</sup> Tao Jiang,<sup>b</sup> Xinyu Shen,<sup>\*a</sup> Jiming Hu,<sup>a</sup> and Hua Tong<sup>\*a</sup>

<sup>a</sup>Key Laboratory of Analytical Chemistry for Biology and Medicine, Ministry of Education, College of Chemistry and Molecular Sciences, Wuhan University, Wuhan 430072, PR China. Fax: +86 027 68752136; Tel: +86 027 68764510; E-mail: [sem@whu.edu.cn](mailto:sem@whu.edu.cn)

<sup>b</sup>Key Laboratory for Oral Biomedical Engineering, Ministry of Education, School and Hospital of Stomatology, Wuhan University, Wuhan 430079, PR China.

### Electronic Supplementary Information

Fig. S1 shows the typical digital photos of the dry monolithic piece of the orientation-structured porous CS/HA scaffold after air drying. The drying step is a common air drying process at room temperature without any special or additional steps.

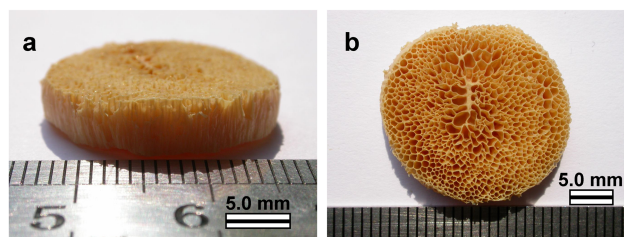

**Fig. S1** Typical digital photos of the orientation-structured porous CS/HA scaffold with unidirectional pores after air drying process: (a) lateral surface picture; (b) surface picture
